# Supplementary material for: A mechanically robust and flexible PEGylated poly(glycerol sebacate)/β-TCP nanoparticle composite membrane for guided bone regeneration
Source: Royal Society of Chemistry journal article supplement (doi:10.1039/c9tb00417c), 2019-01-01
Supplement: c9tb00417c1.pdf [file c9tb00417c1.pdf]

# **Mechanically robust and flexible PEGylated poly(glycerol sebacate)/ $\beta$ -TCP nanoparticles composite membrane for guided bone regeneration**

Shuang Yu<sup>1,2#</sup>, Jun Shi<sup>3#</sup>, Yutong Liu<sup>1,2</sup>, Jiawen Si<sup>3\*</sup>, Yuan Yuan<sup>1,2\*</sup>,

Changsheng Liu<sup>1,2</sup>

<sup>1</sup>*Key Laboratory for Ultrafine Materials of Ministry of Education, East China University of Science and Technology, Shanghai 200237, PR China*

<sup>2</sup>*School of Materials Science and Engineering, East China University of Science and Technology, Shanghai 200237, PR China*

<sup>3</sup>*Department of Oral and Craniomaxillofacial Surgery, Shanghai Ninth People's Hospital, Shanghai Jiao Tong University School of Medicine, Shanghai, 200011, PR China*

# The first two authors contributed equally to this work.

\*Corresponding Author:

E-mail address: [yyuan@ecust.edu.cn](mailto:yyuan@ecust.edu.cn) (Yuan Yuan); [sjwlyl@163.com](mailto:sjwlyl@163.com)

(Jiawen Si)



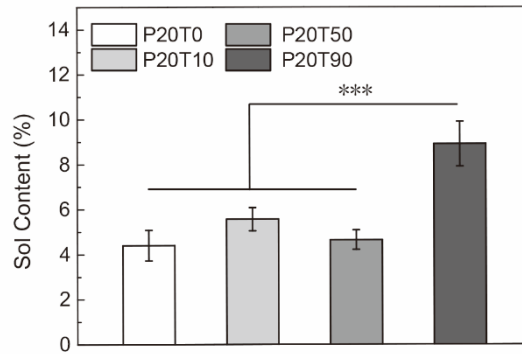

Fig. S3 The sol content of PEGS/ $\beta$ -TCP composite membranes after immersion in THF for 3 days (n = 3, \*\*\*p < 0.001).

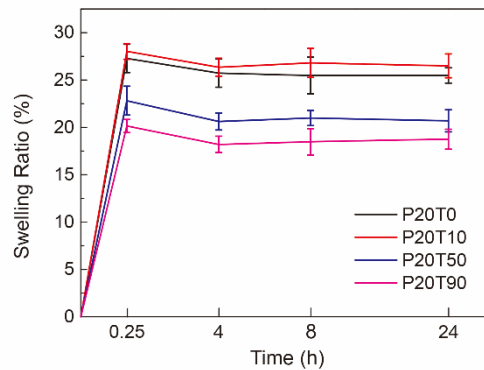

Fig. S4 Swelling behavior of PEGS/ $\beta$ -TCP composite membranes in PBS.

The variation of pH value and  $\text{Ca}^{2+}$  release during cell cultivation were also studied in vitro. In brief, membrane samples were immersed in cell culture medium ( $\alpha$ -MEM, HyClone<sup>TM</sup>, USA) and placed in a constant temperature incubator shaker (37 °C, 80 RPM). At different time points, the pH value of culture medium was measured by pH meter (FE20, Mettler Toledo, Switzerland) and  $\text{Ca}^{2+}$  release was analyzed by inductively coupled plasma atomic emission spectrometer (ICP-AES, Varian 710-ES, Agilent, USA). The medium was refreshed every 2 days in accordance with the renewal of culture medium for in vitro cell culture.

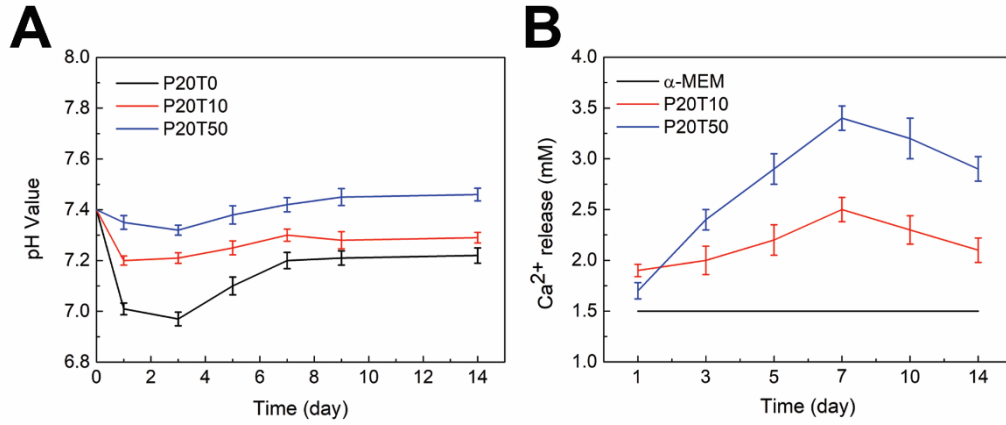

Fig. S5 (A) Change of pH value in culture medium after soaking the PEGS/ $\beta$ -TCP composite membranes for 14 days with medium refreshed every 2 days. Neutralization effect was enhanced with the increase of  $\beta$ -TCP content. (B) Concentration of calcium ions released from the PEGS/ $\beta$ -TCP composite membranes for 14 days with medium refreshed every 2 days. The maximum dose could be detected in P20T50 group.
